# Supplementary material for: A Large-Scale Genomic Association Analysis Identifies the Candidate Genes Regulating Salt Tolerance in Cucumber (Cucumis sativus L.) Seedlings
Source: MDPI journal article supplement (doi:10.3390/ijms23158260), 2022-07-27
Supplement: s1 [file s1]

Table S1 Ecotype information on plant materials for salt tolerance research

| Code | Ecotype                     |
|------|-----------------------------|
| R1   | European                    |
| R2   | North China                 |
| R3   | South China                 |
| R4   | North China-European hybrid |
| R5   | North China-European hybrid |
| R6   | North China-European hybrid |
| R7   | North China-European hybrid |
| R13  | North China                 |
| R14  | North China                 |
| R15  | North China                 |
| R16  | North China                 |
| R17  | North China-European hybrid |
| R18  | North China-European hybrid |
| R19  | North China                 |
| R20  | North China                 |
| R21  | North China                 |
| R22  | North China                 |
| R23  | North China                 |
| R24  | North China                 |
| R25  | North China                 |
| R26  | North China                 |
| R27  | North China-European hybrid |
| R28  | North China                 |
| R29  | North China                 |
| R30  | North China                 |
| R31  | North China-European hybrid |
| R32  | North China-European hybrid |
| R33  | North China-European hybrid |
| R34  | North China                 |
| R35  | North China                 |
| R36  | North China-European hybrid |
| R37  | North China-European hybrid |
| R38  | North China-European hybrid |
| R39  | North China-European hybrid |
| R40  | North China                 |
| R41  | North China-European hybrid |
| R42  | North China-European hybrid |
| R43  | North China-European hybrid |
| R44  | North China-European hybrid |
| R45  | North China                 |
| R47  | European                    |
| R48  | European                    |
| R49  | North China                 |
| R50  | North China                 |
| R51  | North China                 |
| R52  | North China                 |
| R53  | North China                 |
| R54  | North China                 |

|      |                     |
|------|---------------------|
| R55  | North China         |
| R56  | North China         |
| R57  | American processing |
| R58  | American processing |
| R59  | European-Asia       |
| R60  | North China         |
| R62  | South China         |
| R63  | South China         |
| R64  | South China         |
| R65  | American slicing    |
| R67  | North China         |
| R68  | North China         |
| R69  | South China         |
| R70  | South China         |
| R71  | North China         |
| R72  | North China         |
| R73  | North China         |
| R74  | North China         |
| R75  | European            |
| R76  | European            |
| R77  | European            |
| R78  | European            |
| R80  | European            |
| R81  | European            |
| R82  | European            |
| R83  | European            |
| R84  | European            |
| R85  | European            |
| R86  | European            |
| R87  | European            |
| R88  | European            |
| R89  | South China         |
| R90  | South China         |
| R91  | South China         |
| R92  | South China         |
| R93  | South China         |
| R94  | South China         |
| R95  | South China         |
| R96  | South China         |
| R97  | South China         |
| R98  | South China         |
| R99  | South China         |
| R100 | South China         |
| R101 | North China         |
| R102 | North China         |
| R103 | North China         |
| R104 | North China         |
| R105 | North China         |
| R106 | North China         |
| R107 | North China         |

|      |                     |
|------|---------------------|
| R108 | North China         |
| R109 | North China         |
| R110 | North China         |
| R111 | North China         |
| R112 | North China         |
| R113 | North China         |
| R114 | North China         |
| R115 | North China         |
| R116 | North China         |
| R117 | North China         |
| R118 | North China         |
| R119 | North China         |
| R120 | Japan               |
| R121 | Japan               |
| R122 | Japan               |
| R123 | Japan               |
| R124 | Japan               |
| R125 | American processing |
| R126 | American slicing    |
| R127 | American slicing    |
| R128 | American processing |
| R129 | American processing |
| R130 | European            |
| R131 | European            |
| R132 | India               |
| R133 | South China         |
| R134 | American processing |
| R135 | American processing |
| R136 | American processing |
| R137 | American processing |
| R138 | American processing |
| R139 | American slicing    |
| R140 | American slicing    |
| R141 | Japan               |
| R142 | South China         |
| R143 | South China         |
| R148 | American processing |
| R150 | North China         |
| R151 | North China         |
| R152 | North China         |
| R153 | North China         |
| R154 | North China         |
| R155 | North China         |
| R157 | North China         |
| R159 | North China         |
| R160 | North China         |
| R161 | North China         |
| R162 | North China         |
| R163 | North China         |
| R164 | North China         |

|      |                     |
|------|---------------------|
| R165 | North China         |
| R166 | South China         |
| R167 | South China         |
| R168 | North China         |
| R169 | North China         |
| R170 | North China         |
| R171 | North China         |
| R172 | North China         |
| R174 | North China         |
| R175 | North China         |
| R176 | North China         |
| R177 | South China         |
| CG1  | European            |
| CG2  | India               |
| CG3  | Japan               |
| CG4  | Japan               |
| CG5  | European            |
| CG9  | American processing |
| CG10 | European            |
| CG11 | European            |
| CG12 | India               |
| CG13 | European            |
| CG14 | India               |
| CG15 | India               |
| CG16 | India               |
| CG17 | India               |
| CG19 | India               |
| CG21 | India               |
| CG23 | India               |
| CG25 | North China         |
| CG28 | Japan               |
| CG29 | Japan               |
| CG31 | Japan               |
| CG32 | European            |
| CG35 | European            |
| CG36 | American processing |
| CG40 | European            |
| CG43 | American processing |
| CG44 | American processing |
| CG45 | American processing |
| CG49 | India               |
| CG50 | India               |
| CG51 | India               |
| CG59 | South China         |
| CG66 | Xishuangbanna       |
| CG72 | Xishuangbanna       |
| CG77 | Xishuangbanna       |
| CG78 | Xishuangbanna       |
| CG84 | Xishuangbanna       |
| CG85 | Xishuangbanna       |

|              |                    |
|--------------|--------------------|
| CG87         | India              |
| CG88         | India              |
| CG89         | North China        |
| CG91         | North China        |
| CG92         | South China        |
| CG94         | North China        |
| CG96         | North China        |
| CG98         | South China        |
| CG99         | South China        |
| CG100        | North China        |
| CG104        | Japan              |
| CG106        | South China        |
| CG107        | North China        |
| CG108        | North China        |
| CG109        | European           |
| CG110        | European           |
| CG112        | European           |
| CG113        | European           |
| CG114        | European           |
| CG117        | India              |
| CG118        | India              |
| <u>CG120</u> | <u>South China</u> |

Table S2 Phenotypic data of 220 cucumber accessions

| Code | June 2020 | May 2021 |
|------|-----------|----------|
| R1   | 44.9      | 48.0     |
| R2   | 30.0      | 20.4     |
| R3   | 34.2      | 28.5     |
| R4   | 37.2      | 30.6     |
| R5   | 23.5      | 13.5     |
| R6   | 31.5      | 10.4     |
| R7   | 34.2      | 26.1     |
| R13  | 31.7      | 22.2     |
| R14  | 35.1      | 29.4     |
| R15  | 45.0      | 39.4     |
| R16  | 42.0      | 23.5     |
| R17  | 29.4      | 12.9     |
| R18  | 13.1      | 19.0     |
| R19  | 32.4      | 16.8     |
| R20  | 25.8      | 13.8     |
| R21  | 44.4      | 24.6     |
| R22  | 39.0      | 17.4     |
| R23  | 38.7      | 25.8     |
| R24  | 33.1      | 20.3     |
| R25  | 39.4      | 26.6     |
| R26  | 34.7      | 15.8     |
| R27  | 49.5      | 37.5     |
| R28  | 36.6      | 26.4     |
| R29  | 37.4      | 40.5     |
| R30  | 27.0      | 21.4     |
| R31  | 37.8      | 26.6     |
| R32  | 31.8      | 27.9     |
| R33  | 21.0      | 15.6     |
| R34  | 61.2      | 22.6     |
| R35  | 30.0      | 33.6     |
| R36  | 33.0      | 27.2     |
| R37  | 31.1      | 23.4     |
| R38  | 32.9      | 36.6     |
| R39  | 14.9      | 10.2     |
| R40  | 36.0      | 49.5     |
| R41  | 32.6      | 31.8     |
| R42  | 28.2      | 21.0     |
| R43  | 42.0      | 37.8     |
| R44  | 28.8      | 35.4     |
| R45  | 5.6       | 7.0      |
| R47  | 24.0      | 15.6     |
| R48  | 21.6      | 19.4     |
| R49  | 8.1       | 10.4     |
| R50  | 23.2      | 24.2     |
| R51  | 32.3      | 32.9     |
| R52  | 8.1       | 7.2      |

|      |      |      |
|------|------|------|
| R53  | 19.6 | 12.6 |
| R54  | 27.0 | 23.4 |
| R55  | 29.3 | 27.0 |
| R56  | 21.8 | 9.6  |
| R57  | 39.2 | 40.8 |
| R58  | 32.9 | 18.0 |
| R59  | 55.8 | 52.2 |
| R60  | 48.6 | 40.2 |
| R62  | 3.6  | 11.7 |
| R63  | 7.2  | 11.7 |
| R64  | 21.0 | 27.0 |
| R65  | 21.6 | 17.7 |
| R67  | 27.6 | 27.6 |
| R68  | 38.4 | 31.8 |
| R69  | 48.6 | 32.6 |
| R70  | 43.8 | 38.7 |
| R71  | 33.9 | 29.7 |
| R72  | 35.1 | 21.0 |
| R73  | 45.0 | 54.0 |
| R74  | 23.4 | 51.0 |
| R75  | 33.6 | 22.8 |
| R76  | 13.8 | 16.2 |
| R77  | 16.8 | 11.6 |
| R78  | 12.0 | 12.9 |
| R80  | 21.6 | 45.0 |
| R81  | 20.4 | 16.5 |
| R82  | 24.6 | 14.3 |
| R83  | 11.0 | 20.4 |
| R84  | 22.2 | 16.2 |
| R85  | 15.8 | 21.0 |
| R86  | 22.5 | 9.3  |
| R87  | 22.5 | NA   |
| R88  | 26.1 | NA   |
| R89  | 37.2 | 36.0 |
| R90  | 22.1 | 12.0 |
| R91  | 35.5 | 37.8 |
| R92  | 26.7 | 19.8 |
| R93  | 29.8 | 15.0 |
| R94  | 16.2 | 22.2 |
| R95  | 36.0 | 29.4 |
| R96  | 43.2 | 37.8 |
| R97  | 18.0 | 8.3  |
| R98  | 27.0 | 14.4 |
| R99  | 24.8 | 14.0 |
| R100 | 27.0 | 26.2 |
| R101 | 26.4 | 16.2 |
| R102 | 34.8 | 38.0 |
| R103 | 41.4 | 28.2 |

|      |      |      |
|------|------|------|
| R104 | 3.0  | 12.6 |
| R105 | 29.7 | 18.2 |
| R106 | 16.5 | 21.6 |
| R107 | 37.8 | 34.2 |
| R108 | 27.0 | 23.4 |
| R109 | 30.6 | 28.2 |
| R110 | 34.2 | 41.4 |
| R111 | 25.2 | 10.4 |
| R112 | 15.8 | 16.8 |
| R113 | 36.0 | 15.8 |
| R114 | 36.6 | 13.5 |
| R115 | 27.0 | 11.1 |
| R116 | 10.5 | 9.0  |
| R117 | 43.2 | 46.4 |
| R118 | 33.8 | 28.8 |
| R119 | 12.6 | 18.0 |
| R120 | 7.2  | 13.2 |
| R121 | 17.4 | 15.3 |
| R122 | 25.2 | 23.8 |
| R123 | 42.0 | 38.4 |
| R124 | 5.0  | 10.8 |
| R125 | 15.3 | 38.6 |
| R126 | 20.4 | 28.2 |
| R127 | 44.1 | 37.8 |
| R128 | 27.6 | 34.2 |
| R129 | 22.2 | 46.5 |
| R130 | 7.8  | 23.8 |
| R131 | 55.0 | 46.2 |
| R132 | 57.0 | 69.0 |
| R133 | 45.0 | 55.2 |
| R134 | 36.6 | 35.1 |
| R135 | 36.3 | 27.9 |
| R136 | 25.5 | 52.2 |
| R137 | 23.1 | 21.6 |
| R138 | 5.6  | 14.8 |
| R139 | 7.1  | 57.9 |
| R140 | 27.6 | 69.3 |
| R141 | 27.0 | 32.7 |
| R142 | 32.4 | 26.7 |
| R143 | 31.0 | 36.6 |
| R148 | 43.2 | 41.1 |
| R150 | 38.7 | 23.4 |
| R151 | 25.8 | 36.6 |
| R152 | 36.8 | 42.3 |
| R153 | 22.5 | 20.6 |
| R154 | 45.9 | 21.6 |
| R155 | 35.4 | 30.0 |
| R157 | 30.0 | 22.4 |

|      |       |      |
|------|-------|------|
| R159 | 31.5  | 16.5 |
| R160 | 35.4  | 36.6 |
| R161 | 34.8  | 31.5 |
| R162 | 30.6  | 25.5 |
| R163 | 11.3  | 15.0 |
| R164 | 23.4  | 27.8 |
| R165 | 21.8  | 18.4 |
| R166 | 43.8  | 22.2 |
| R167 | 33.0  | 45.0 |
| R168 | 40.0  | 35.1 |
| R169 | 51.0  | 37.0 |
| R170 | 46.8  | 37.8 |
| R171 | 35.1  | 25.8 |
| R172 | 24.8  | 21.0 |
| R174 | 5.4   | 8.6  |
| R175 | 39.6  | 22.8 |
| R176 | 47.4  | 36.0 |
| R177 | 40.5  | 38.7 |
| CG1  | 7.4   | 14.1 |
| CG2  | 42.0  | 16.2 |
| CG3  | 21.2  | 17.3 |
| CG4  | 23.4  | 18.3 |
| CG5  | 18.0  | 20.3 |
| CG9  | 29.4  | 22.2 |
| CG10 | 26    | 20.4 |
| CG11 | 34.8  | 25.8 |
| CG12 | 51    | 49.2 |
| CG13 | 63    | 63   |
| CG14 | 56.25 | 60   |
| CG15 | 49.5  | 53.7 |
| CG16 | 36    | 24.9 |
| CG17 | 40.2  | 30.6 |
| CG19 | 47.4  | 48.6 |
| CG21 | 49.5  | 51   |
| CG23 | 34.2  | 27.7 |
| CG25 | 19.8  | 51.6 |
| CG28 | 22.5  | 34.5 |
| CG29 | 4.8   | 28.2 |
| CG31 | 47.25 | 41.9 |
| CG32 | 42.6  | 29.7 |
| CG35 | 32.25 | 34.2 |
| CG36 | 34.5  | 25.8 |
| CG40 | 30.6  | 27.6 |
| CG43 | 40.05 | 30.2 |
| CG44 | 33    | 28.5 |
| CG45 | 39    | 39.9 |
| CG49 | 45.3  | 39   |
| CG50 | 61.8  | 55   |

|       |        |       |
|-------|--------|-------|
| CG51  | 27     | 22.35 |
| CG59  | 33.75  | 44.4  |
| CG66  | 12     | NA    |
| CG72  | 45     | 66.6  |
| CG77  | 63     | 66.15 |
| CG78  | 12.6   | 31.8  |
| CG84  | 40.275 | 67.8  |
| CG85  | 40.5   | 11.7  |
| CG87  | 52.2   | 52.5  |
| CG88  | 40.5   | 57    |
| CG89  | 43.5   | 18.75 |
| CG91  | 10.2   | 25.2  |
| CG92  | 50.7   | 41.7  |
| CG94  | 25.2   | 30    |
| CG96  | 40.5   | 50.4  |
| CG98  | 42.3   | 36.9  |
| CG99  | 31.05  | 16.2  |
| CG100 | 16.5   | 9     |
| CG104 | 4.95   | 9     |
| CG106 | 21.6   | 33.6  |
| CG107 | 42.6   | 27    |
| CG108 | 17.25  | 21    |
| CG109 | 40.5   | 33.6  |
| CG110 | 33.6   | 30    |
| CG112 | 51     | 36.9  |
| CG113 | 54     | 42    |
| CG114 | 33.4   | 28.2  |
| CG117 | 34.2   | 20.6  |
| CG118 | 54     | 51.75 |
| CG120 | 39.6   | 28.35 |

---

Table S3 Group of accessions for salt tolerance in seedling stage

| Salt tolerance Groups            | Groups | Code                                                                                                                                                                                                                                                                                                                                                                                |
|----------------------------------|--------|-------------------------------------------------------------------------------------------------------------------------------------------------------------------------------------------------------------------------------------------------------------------------------------------------------------------------------------------------------------------------------------|
| highly salt-tolerant group       | I      | R45, CG104, R174, R62, R52, R104, R124, R49, R63, R116, R138, R120, CG1, CG66, R78, R39, CG100, R97, R163, R77, R76, R119, R56, R83, R130, R86, R18, R53, R112, R121, CG29, R90, CG91, R111, R33, R85, R81, R5, R115, R106, CG5, CG108, R84, R94, CG3, R99, R82, R65, R20, R47, R165, R48, R98, CG4, R6, R17, R101, R153                                                            |
| salt-tolerant group              | II     | CG78, R137, R93, R87, R172, CG10, R92, CG99, R50, R105, R64, R159, R30, R126, R122, R19, R42, CG51, R114, R2, R26, R54, R108, R58, R164, CG9, R113, R88, CG85, R157, R100, R24, R13, R125, R37, CG117, R67, CG94, CG106, R72, R162, R55, R22, R75, CG28                                                                                                                             |
| intermediate salt-tolerant group | III    | CG2, CG40, R109, R142, R141, R32, R36, CG36, R7, CG11, CG16, R171, CG44, CG114, R128, CG23, R150, CG89, R151, R175, R118, R3, R28, R71, CG110, R35, R44, R135, R41, R31, R14, R23, R139, R51, R95, R155, R16, R25, R166, R161, CG35, R80, R154, R143, R4, CG120, R129, R21, R38, R103, CG107, R68, CG43, CG17, CG25, R134, R107, R160, CG32, R102, R89, R91, CG109, R74, R168, R110 |
| salt-sensitive group             | IV     | R136, R29, R167, CG59, CG45, R152, R177, CG98, R43, R57, R123, R96, R69, R127, R70, R176, R34, R148, CG49, R15, R170, R40, R27, CG112, R169, R60, CG31, R117, CG96, CG92, R1                                                                                                                                                                                                        |
| highly salt-sensitive group      | V      | CG19, CG113, R140, CG88, R73, R133, CG12, CG21, R131, CG15, CG87, CG118, R59, CG84, CG72, CG14, CG50, R132, CG13, CG77                                                                                                                                                                                                                                                              |

Table S4 Signal locus and genes information detected by GWAS analysis

| GWAS<br>region | signal | Gene name            | physical location |
|----------------|--------|----------------------|-------------------|
| <i>gST2.1</i>  |        | <i>CsaV3_2G03504</i> | 23407980-23412070 |
|                |        | <i>CsaV3_2G03505</i> | 23415651-23419542 |
|                |        | <i>CsaV3_2G03506</i> | 23419391-23419631 |
|                |        | <i>CsaV3_2G03507</i> | 23428043-23434112 |
|                |        | <i>CsaV3_2G03508</i> | 23433845-23434050 |
|                |        | <i>CsaV3_2G03509</i> | 23458082-23459247 |
|                |        | <i>CsaV3_2G03510</i> | 23475335-23479035 |
|                |        | <i>CsaV3_2G03511</i> | 23480766-23489469 |
|                |        | <i>CsaV3_2G03512</i> | 23490932-23493700 |
|                |        | <i>CsaV3_2G03513</i> | 23501857-23505429 |
| <i>gST3.1</i>  |        | <i>CsaV3_2G03514</i> | 23505456-23506957 |
|                |        | <i>CsaV3_3G02370</i> | 21489794-21514458 |
|                |        | <i>CsaV3_3G02371</i> | 21522682-21532658 |
|                |        | <i>CsaV3_3G02372</i> | 21540330-21542136 |
|                |        | <i>CsaV3_3G02373</i> | 21549957-21553175 |
| <i>gST3.2</i>  |        | <i>CsaV3_3G02374</i> | 21554667-21555910 |
|                |        | <i>CsaV3_3G02375</i> | 21569210-21577666 |
|                |        | <i>CsaV3_3G03024</i> | 25959150-25964239 |
|                |        | <i>CsaV3_3G03025</i> | 25980074-25985538 |
|                |        | <i>CsaV3_3G03026</i> | 25985730-25989154 |
|                |        | <i>CsaV3_3G03027</i> | 25991251-26009604 |
|                |        | <i>CsaV3_3G03028</i> | 26015518-26019865 |
|                |        | <i>CsaV3_3G03029</i> | 26018818-26025938 |
|                |        | <i>CsaV3_3G03030</i> | 26029082-26038086 |
|                |        | <i>CsaV3_4G02768</i> | 16971087-16972740 |
| <i>gST4.1</i>  |        | <i>CsaV3_4G02769</i> | 16971478-16977878 |
|                |        | <i>CsaV3_4G02770</i> | 16988121-16988421 |
|                |        | <i>CsaV3_4G02771</i> | 17008408-17011665 |
|                |        | <i>CsaV3_4G02772</i> | 17019206-17031571 |
|                |        | <i>CsaV3_4G02773</i> | 17047856-17052059 |
| <i>gST4.2</i>  |        | <i>CsaV3_4G02774</i> | 17063296-17073446 |
|                |        | <i>CsaV3_4G03313</i> | 23431012-23433256 |
|                |        | <i>CsaV3_4G03314</i> | 23433929-23439249 |
|                |        | <i>CsaV3_4G03315</i> | 23439698-23445777 |
|                |        | <i>CsaV3_4G03316</i> | 23453901-23455766 |
|                |        | <i>CsaV3_4G03317</i> | 23459779-23462177 |
|                |        | <i>CsaV3_4G03318</i> | 23465790-23470303 |
|                |        | <i>CsaV3_4G03319</i> | 23474366-23474623 |
|                |        | <i>CsaV3_4G03320</i> | 23492178-23496591 |
|                |        | <i>CsaV3_4G03321</i> | 23497530-23510992 |
| <i>gST5.1</i>  |        | <i>CsaV3_4G03322</i> | 23512731-23513007 |
|                |        | <i>CsaV3_4G03323</i> | 23516885-23522184 |
|                |        | <i>CsaV3_5G02350</i> | 17873647-17874229 |
|                |        | <i>CsaV3_5G02351</i> | 17877347-17877500 |
|                |        | <i>CsaV3_5G02352</i> | 17884509-17885702 |
|                |        | <i>CsaV3_5G02353</i> | 17891353-17909145 |
|                |        | <i>CsaV3_5G02354</i> | 17914991-17921238 |
|                |        | <i>CsaV3_5G02355</i> | 17922316-17923497 |
|                |        | <i>CsaV3_5G02356</i> | 17929552-17930189 |

|        |                                          |
|--------|------------------------------------------|
| gST6.1 | <i>CsaV3_5G02357</i> ( 17945993-17946614 |
|        | <i>CsaV3_6G00977</i> ( 7918201-7918627   |
|        | <i>CsaV3_6G00978</i> ( 7923874-7924730   |
|        | <i>CsaV3_6G00979</i> ( 7944527-7951003   |
|        | <i>CsaV3_6G00980</i> ( 7962016-7971218   |
|        | <i>CsaV3_6G00981</i> ( 7971665-7978991   |
|        | <i>CsaV3_6G00982</i> ( 7980131-7980390   |
|        | <i>CsaV3_6G00983</i> ( 7984667-7987751   |
|        | <i>CsaV3_6G00984</i> ( 7994027-8000088   |
|        | <i>CsaV3_6G00985</i> ( 8001447-8004575   |
|        | <i>CsaV3_6G00986</i> ( 8008859-8009051   |
|        | <i>CsaV3_6G00987</i> ( 8009088-8009436   |
|        | <i>CsaV3_6G00988</i> ( 8011748-8019379   |

---

Table S5 Candidate genes annotation of GWAS Analysis.

| Gene name             | Gene annotation                         | Homologous genes of <i>Arabidopsis thaliana</i> | Functions annotation                                                                                                                            |
|-----------------------|-----------------------------------------|-------------------------------------------------|-------------------------------------------------------------------------------------------------------------------------------------------------|
| <i>CsaV3_2G035120</i> | Isocitrate lyase                        | <i>AT3G21720</i>                                | Encodes a glyoxylate cycle enzyme isocitrate lyase (ICL) involved in salt tolerance.                                                            |
| <i>CsaV3_3G023710</i> | Ankyrin repeat family protein           | <i>At3g12360</i>                                | Involved in salt stress tolerance; May act through abscisic acid (ABA) signaling pathways and promote reactive oxygen species (ROS) production. |
| <i>CsaV3_4G033150</i> | Phosphoenolpyruvate carboxylase protein | <i>AT1G53310</i>                                | Encodes one of four Arabidopsis phosphoenolpyruvate carboxylase proteins; Plays an important role in carbon and nitrogen metabolism.            |
| <i>CsaV3_5G023530</i> | Phd finger protein, putative            | <i>AT1G77800</i>                                | PHD finger family protein;(source:Araport11)                                                                                                    |
| <i>CsaV3_6G009810</i> | Pesticidal crystal cry8Ba protein       | <i>AT5G48310</i>                                | Responsiveness to abscisic acid (ABA), salt and drought 1; Protein of unknown function that may be involved in stress response.                 |

Table S6 Primers for the real time fluorescence quantitative PCR

| Gene name                        | Forward primer                | Reverse primer                |
|----------------------------------|-------------------------------|-------------------------------|
| <i>CsaV3_2G03512</i><br><i>0</i> | GCTGCCTCCTTCTCTGTTTCCTT       | GCCGTCGTGTTAGCTTGAACCT        |
| <i>CsaV3_3G02371</i><br><i>0</i> | AAGAGGCACGGGTCTGAAATGG        | GCGTTGGATCAATGTCAAGAAGC<br>A  |
| <i>CsaV3_4G03315</i><br><i>0</i> | GCTTTGTACGACAAGCTCTTAG        | GGTAGTTTGGATCACGAATTCG        |
| <i>CsaV3_5G02353</i><br><i>0</i> | AACGCAAAGTAATTCCTTGGAC        | CTTATTGAAGAATCGTGGCCAG        |
| <i>CsaV3_6G00981</i><br><i>0</i> | CGCTTTGCCTCCATTGAAATTCCA<br>T | CGTAATCTCCATCGTCGTCGTCAT<br>C |
| <i>Ubiquitin</i>                 | CACCAAGCCCAAGAAGATC           | TAAACCTAATCACCACCAGC          |
