# Supplementary material for: A Large-Scale Genomic Association Analysis Identifies the Candidate Genes Regulating Salt Tolerance in Cucumber (Cucumis sativus L.) Seedlings
Source: MDPI journal article supplement (doi:10.3390/ijms23158260), 2022-07-27
Supplement: s1 [file s1]

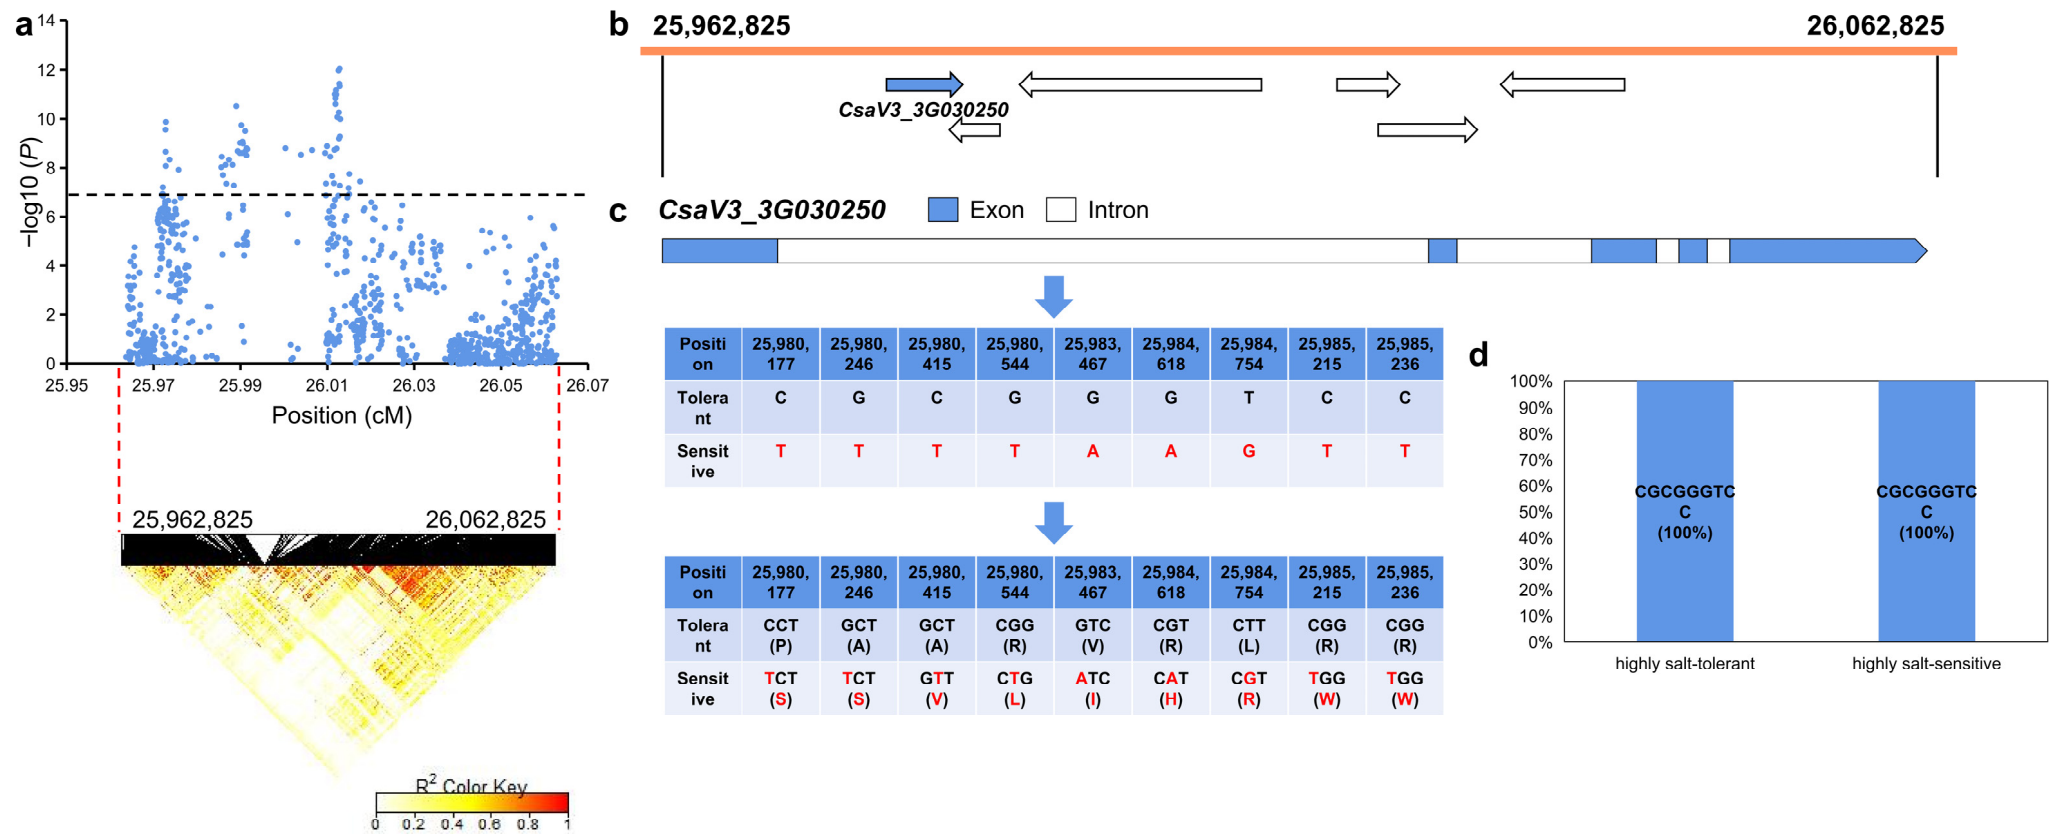

**Figure S1.** Identification of the candidate gene related to salt tolerance for the locus *gST3.2*.

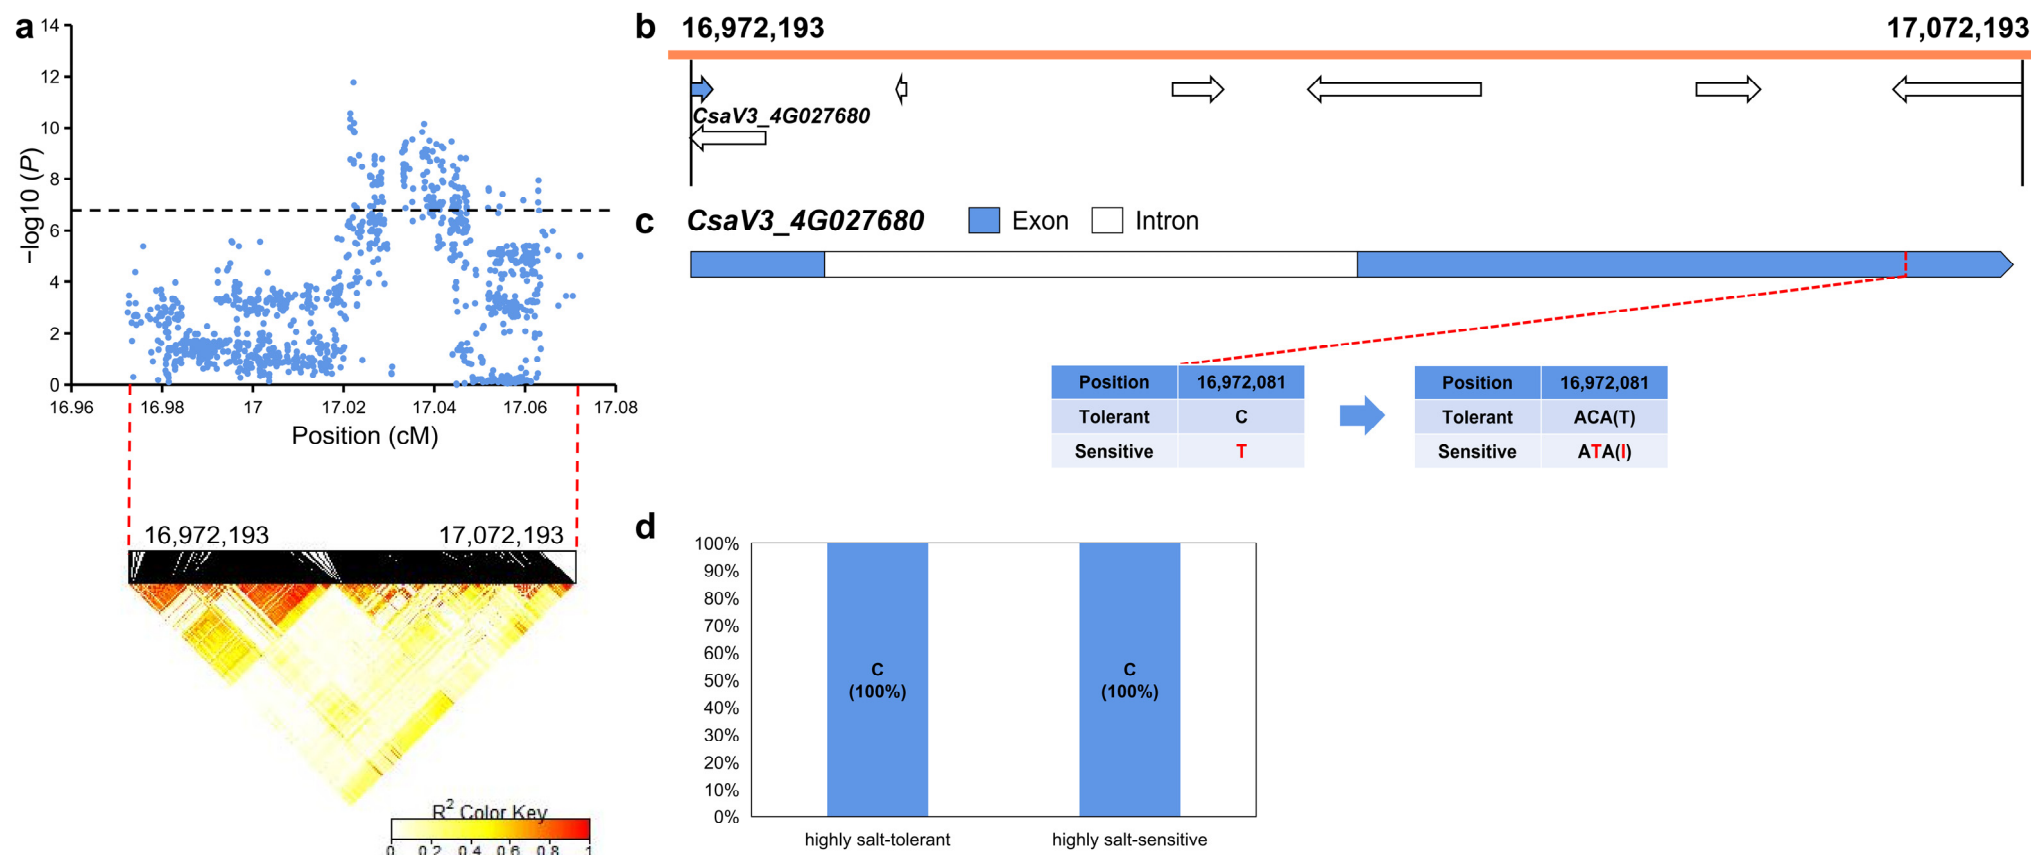

**Figure S2.** Identification of the candidate gene related to salt tolerance for the locus *gST4.1*.
